# Supplementary material
Source: PubMed Central journal article supplement (PMC8379919)
Supplement: pnas.2022724118.sapp.pdf [file pnas.2022724118.sapp.pdf]

## Supplementary Materials

Table S1: Detailed statistical results for the control and unmanipulated plants (displayed in Fig. S1 for  $\delta^{15}\text{N}$  and Fig. S2 for %N). Taxon names follow Table 1. (\*<0.05, \*\*<0.01, \*\*\*<0.001). A mixed-effect model was used with the species-plant part combination as a fixed effect, and plant (nested in species) as a random effect. There was strong evidence for differences between groups:  $F=6.9347$ ,  $df=6,7.27$ ,  $p\text{-value}=0.010$  for  $\delta^{15}\text{N}$  as the response, and  $F=24.447$ ,  $df=6,22.7$ ,  $p\text{-value}=7.8\text{e-}09$  for  $\log(\%N)$  as response. The table below shows the pairwise comparisons between all species-plant part combinations, conducted with the Tukey method from the full model.

|                                                          | p-value for $\delta^{15}\text{N}$ | p-value for $\log(\%N)$ |
|----------------------------------------------------------|-----------------------------------|-------------------------|
| <i>Erigeron</i> (stem) - <i>Erigeron</i> (leaf)          | 0.9994                            | <.0001***               |
| <i>Erigeron</i> (stem) - <i>Nephrophyllidium</i> (leaf)  | 0.9977                            | <.0001***               |
| <i>Erigeron</i> (stem) - <i>Drosera</i> (leaf)           | 0.0085**                          | <.0001***               |
| <i>Erigeron</i> (stem) - <i>Triantha</i> (leaf)          | 0.0351*                           | 0.0001**                |
| <i>Erigeron</i> (stem) - <i>Triantha</i> (fruit)         | 0.0180*                           | <.0001***               |
| <i>Erigeron</i> (stem) - <i>Triantha</i> (stem)          | 0.5627                            | 1.0                     |
| <i>Erigeron</i> (leaf) - <i>Nephrophyllidium</i> (leaf)  | 1.0                               | 1.0                     |
| <i>Erigeron</i> (leaf) - <i>Drosera</i> (leaf)           | 0.0045**                          | 0.8935                  |
| <i>Erigeron</i> (leaf) - <i>Triantha</i> (leaf)          | 0.0192*                           | 0.4375                  |
| <i>Erigeron</i> (leaf) - <i>Triantha</i> (fruit)         | 0.0096**                          | 0.7539                  |
| <i>Erigeron</i> (leaf) - <i>Triantha</i> (stem)          | 0.4112                            | <.0001***               |
| <i>Nephrophyllidium</i> (leaf) - <i>Drosera</i> (leaf)   | 0.0024**                          | 0.9510                  |
| <i>Nephrophyllidium</i> (leaf) - <i>Triantha</i> (leaf)  | 0.0106*                           | 0.5544                  |
| <i>Nephrophyllidium</i> (leaf) - <i>Triantha</i> (fruit) | 0.0053**                          | 0.8516                  |
| <i>Nephrophyllidium</i> (leaf) - <i>Triantha</i> (stem)  | 0.2875                            | <.0001***               |
| <i>Drosera</i> (leaf) - <i>Triantha</i> (leaf)           | 0.9942                            | 0.9816                  |
| <i>Drosera</i> (leaf) - <i>Triantha</i> (fruit)          | 0.9999                            | 0.9999                  |
| <i>Drosera</i> (leaf) - <i>Triantha</i> (stem)           | 0.5095                            | <.0001***               |
| <i>Triantha</i> (leaf) - <i>Triantha</i> (fruit)         | 0.9989                            | 0.9975                  |
| <i>Triantha</i> (leaf) - <i>Triantha</i> (stem)          | 0.6039                            | 0.0004**                |
| <i>Triantha</i> (fruit) - <i>Triantha</i> (stem)         | 0.4024                            | 0.0002**                |

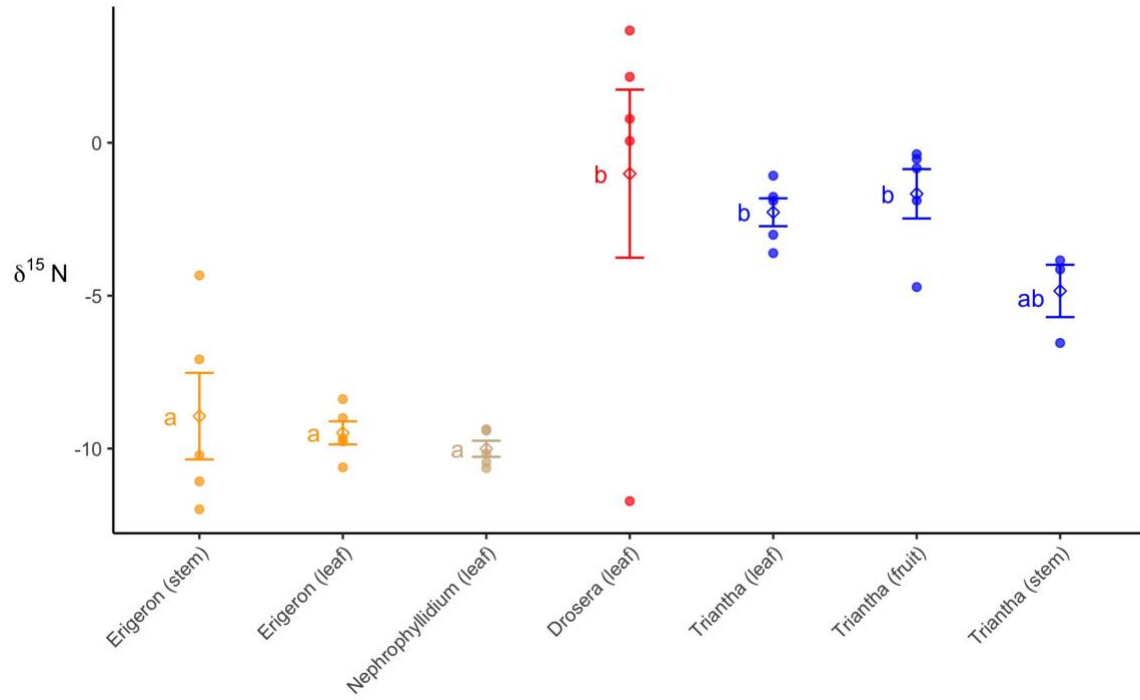

Fig. S1:  $\delta^{15}\text{N}$  values (points), means (diamonds) and standard errors (bars) from control and unmanipulated plants. Means sharing the same letter are not statistically different at level 0.05, based on Table S1.

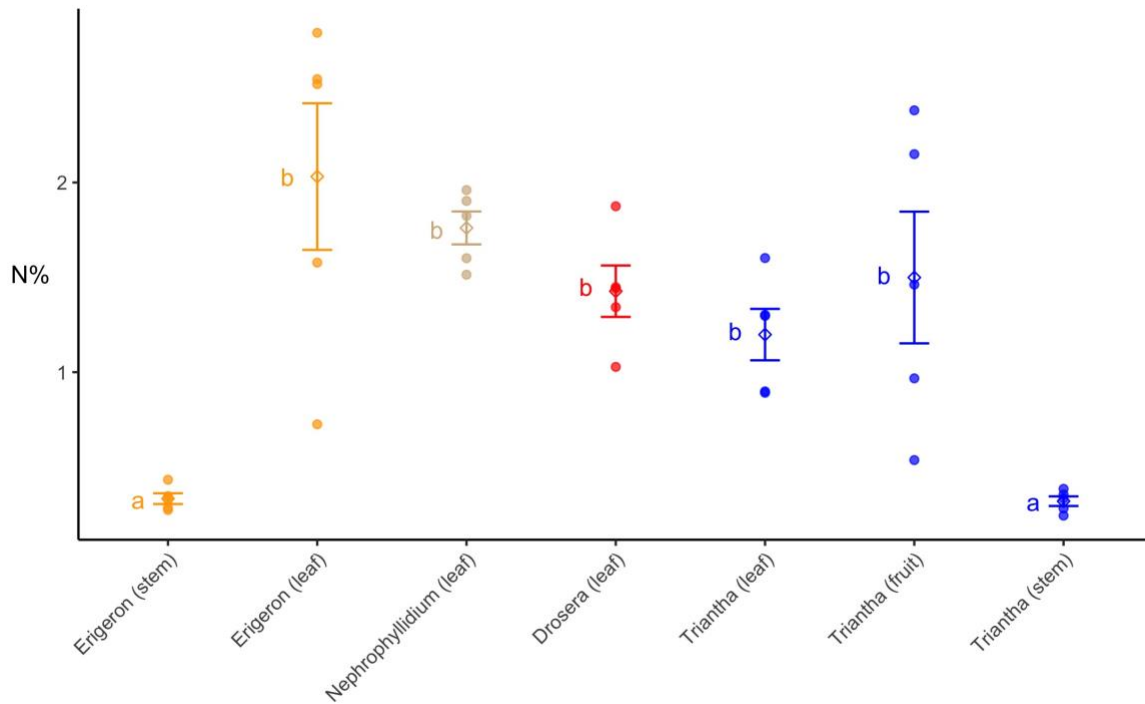

Fig. S2: %N values (points), means (diamonds) and standard errors (bars) from control and unmanipulated plants. Means sharing the same letter are not statistically different at level 0.05, based on Table S1.

Table S2: Detailed statistical results for Fig. 2. Taxon names follow Table 1. (\*<0.05, \*\*<0.01, \*\*\*<0.001). A two-way ANOVA was used with treatment and species as fixed effects. There was strong evidence for a treatment  $\times$  species interaction:  $F=19.24$ ,  $df=4,42$ ,  $p\text{-value}=4.6e-09$  for  $\log(\delta^{15}\text{N} +13)$  as the response, and  $F=5.33$ ,  $df=4,46$ ,  $p\text{-value}=0.0013$  for  $\log(\%N)$  as response. The table below shows the pairwise comparisons between treatments for each species individually, conducted with the Tukey method from the full model.

|                 | p-value for $\log(\delta^{15}\text{N} +13)$ ,<br>Tukey tests, $df=42$ | p-value for $\log(\%N)$ ,<br>Tukey tests, $df=46$ |
|-----------------|-----------------------------------------------------------------------|---------------------------------------------------|
| <i>Erigeron</i> |                                                                       |                                                   |
| 2_week-1_week   | 0.8930                                                                | 0.9172                                            |
| control-1_week  | 0.7500                                                                | 0.0813                                            |
| control-2_week  | 0.9602                                                                | 0.1787                                            |
| <i>Drosera</i>  |                                                                       |                                                   |
| 2_week-1_week   | 0.3264                                                                | 0.1739                                            |
| control-1_week  | <.0001***                                                             | 0.6505                                            |
| control-2_week  | <.0001***                                                             | 0.0251*                                           |
| <i>Triantha</i> |                                                                       |                                                   |
| 2_week-1_week   | <.0001***                                                             | <.0001***                                         |
| control-1_week  | 0.0608                                                                | 0.0003**                                          |
| control-2_week  | <.0001***                                                             | 0.9154                                            |

Table S3: Detailed statistical results for *Triantha occidentalis* (displayed in Fig. S3 for  $\delta^{15}\text{N}$  and Fig. S4 for %N). Using a mixed-effect model with treatment and plant part as fixed effects, plant (nested in treatment) as a random effect and Satterthwaite's method to determine denominator degrees of freedom, there was strong evidence for a treatment  $\times$  plant part interaction:  $F=31.73$ ,  $df=6,50.5$ ,  $p\text{-value}=1.7\text{e-}15$  for  $\log(\delta^{15}\text{N} +13)$ , and  $F= 5.75$   $df=6,78$ ,  $p\text{-value}=5.5\text{e-}05$  for %N. The table below shows the result of a one-way ANOVA on the data for each plant part individually (because of the interaction and to better meet the equal-variance assumption), and the treatment comparisons for each plant part conducted with the Tukey method in case the F-test was significant.

|                             | p-values for $\log(\delta^{15}\text{N} +13)$ :<br>F and Tukey tests | p-values for %N:<br>F and Tukey tests             |
|-----------------------------|---------------------------------------------------------------------|---------------------------------------------------|
| <b>leaf:</b> one-way ANOVA  | $F=5.77$ , $df=3,26$ , $p=0.0036^{**}$                              | $F=0.31$ , $df=3,26$ , $p=0.82$                   |
| control - 1_week            | 0.6928                                                              | not run (non-significant F-test)                  |
| control - 2_weeks           | 0.0052 <sup>**</sup>                                                | not run (non-significant F-test)                  |
| control - double_insects    | 0.2105                                                              | not run (non-significant F-test)                  |
| 1_week - 2_weeks            | 0.0181 <sup>**</sup>                                                | not run (non-significant F-test)                  |
| 1_week - double_insects     | 0.6200                                                              | not run (non-significant F-test)                  |
| 2_weeks - double_insects    | 0.5186                                                              | not run (non-significant F-test)                  |
| <b>fruit:</b> one-way ANOVA | $F=7.17$ , $df=3,26$ , $p=0.0011^{**}$                              | $F=11.433$ , $df=3,26$ , $p=5.8\text{e-}05^{***}$ |
| control - 1_week            | 0.1122                                                              | 0.0135 <sup>**</sup>                              |
| control - 2_weeks           | 0.0040 <sup>**</sup>                                                | 0.9514                                            |
| control - double_insects    | 0.0016 <sup>**</sup>                                                | 0.4757                                            |
| 1_week - 2_weeks            | 0.3004                                                              | 0.0004 <sup>**</sup>                              |
| 1_week - double_insects     | 0.0893                                                              | 0.0002 <sup>**</sup>                              |
| 2_weeks - double_insects    | 0.7481                                                              | 0.6589                                            |
| <b>stem:</b> one-way ANOVA  | $F=59.5$ , $df=3,21$ , $p=2\text{e-}10^{***}$                       | $F=9.51$ , $df=3,26$ , $p=0.0002^{***}$           |
| control - 1_week            | 0.0446 <sup>*</sup>                                                 | 0.0118 <sup>**</sup>                              |
| control - 2_weeks           | <.0001 <sup>***</sup>                                               | 0.9974                                            |
| control - double_insects    | <.0001 <sup>***</sup>                                               | 0.8251                                            |
| 1_week - 2_weeks            | <.0001 <sup>***</sup>                                               | 0.0010 <sup>**</sup>                              |
| 1_week - double_insects     | <.0001 <sup>***</sup>                                               | 0.0010 <sup>**</sup>                              |
| 2_weeks - double_insects    | 0.8825                                                              | 0.8541                                            |

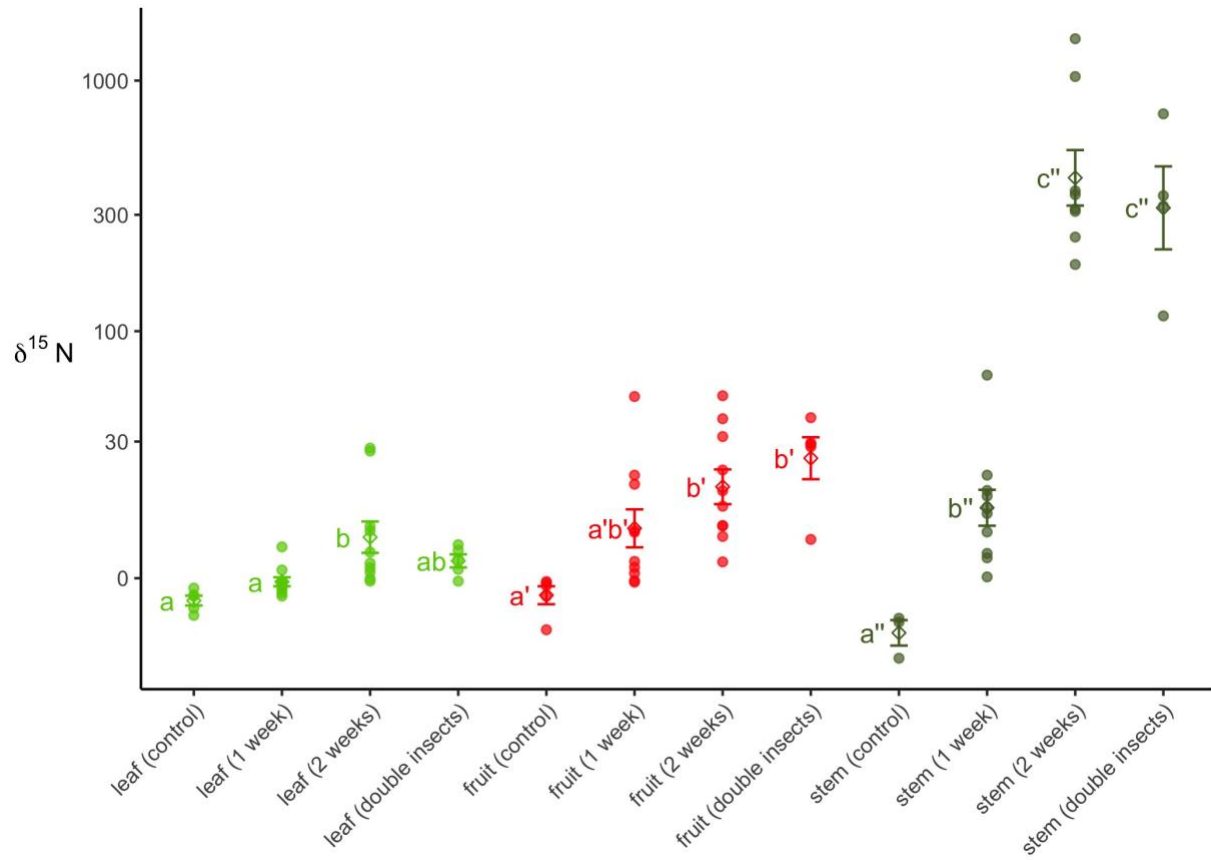

Fig. S3: *Triantha occidentalis*  $\delta^{15}\text{N}$  values (points), group means (diamonds) and standard errors (bars). Groups means sharing the same letter are not statistically different at level 0.05, based on Table S3. The values are plotted on the scale used for analysis,  $\log(\delta^{15}\text{N} + 13)$ , and the vertical axis indicates the raw  $\delta^{15}\text{N}$  values on their original scale.

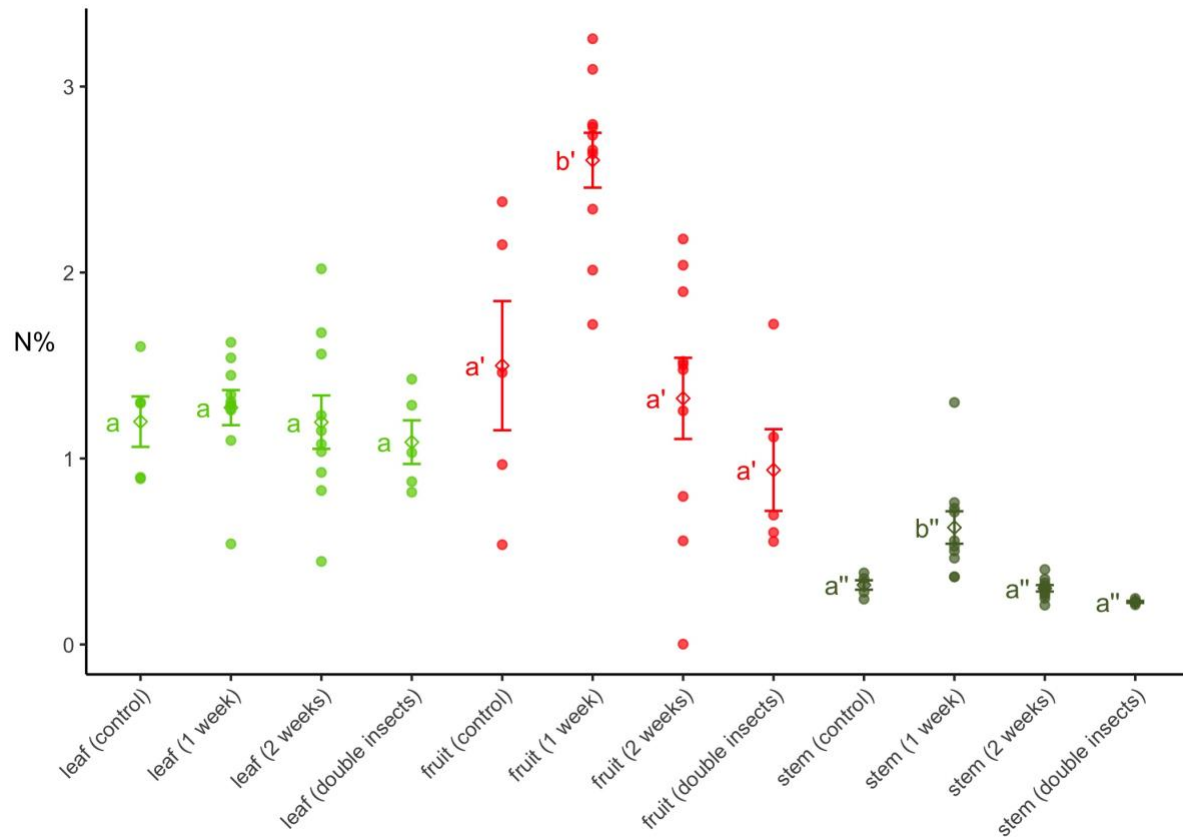

Fig. S4: *Triantha occidentalis* %N values (points), group means (diamonds) and standard errors (bars). Groups means sharing the same letter are not statistically different at level 0.05, based on Table S3.

Table S4. Raw data of N content and  $\delta^{15}\text{N}$ . Names follow Table 1. Each individual plant is identified by a number.

|                                              | $\delta^{15}\text{N}$ | %N   |
|----------------------------------------------|-----------------------|------|
| Non-carnivorous plants                       |                       |      |
| <i>Erigeron peregrinus</i> (stem, control)1  | -4.34                 | 0.27 |
| <i>E. peregrinus</i> (stem, control)2        | -11.98                | 0.43 |
| <i>E. peregrinus</i> (stem, control)3        | -10.22                | 0.28 |
| <i>E. peregrinus</i> (stem, control)4        | -7.08                 | 0.35 |
| <i>E. peregrinus</i> (stem, control)5        | -11.07                | 0.33 |
| <br>                                         |                       |      |
| <i>E. peregrinus</i> (stem, 1 week)1         | -8.25                 | 0.26 |
| <i>E. peregrinus</i> (stem, 1 week)2         | -9.50                 | 0.47 |
| <i>E. peregrinus</i> (stem, 1 week)3         | -9.82                 | 0.72 |
| <i>E. peregrinus</i> (stem, 1 week)4         | -5.16                 | 0.43 |
| <i>E. peregrinus</i> (stem, 1 week)5         | -9.57                 | 0.67 |
| <br>                                         |                       |      |
| <i>E. peregrinus</i> (stem, 2 weeks)1        | -7.91                 | 0.38 |
| <i>E. peregrinus</i> (stem, 2 weeks)2        | -5.35                 | 0.42 |
| <i>E. peregrinus</i> (stem, 2 weeks)3        | -11.76                | 0.52 |
| <i>E. peregrinus</i> (stem, 2 weeks)4        | -10.59                | 0.44 |
| <i>E. peregrinus</i> (stem, 2 weeks)5        | -8.59                 | 0.49 |
| <br>                                         |                       |      |
| <i>E. peregrinus</i> (leaf, control)1        | -9.8                  | 0.73 |
| <i>E. peregrinus</i> (leaf, control)2        | -9.0                  | 2.79 |
| <i>E. peregrinus</i> (leaf, control)3        | -9.7                  | 1.58 |
| <i>E. peregrinus</i> (leaf, control)4        | -10.6                 | 2.52 |
| <i>E. peregrinus</i> (leaf, control)5        | -8.4                  | 2.55 |
| <br>                                         |                       |      |
| <i>Neprophyllidium crista-galli</i> (leaf)1  | -10.4                 | 1.96 |
| <i>N. crista-galli</i> (leaf)2               | -10.6                 | 1.60 |
| <i>N. crista-galli</i> (leaf)3               | -10.2                 | 1.51 |
| <i>N. crista-galli</i> (leaf)4               | -9.4                  | 1.82 |
| <i>N. crista-galli</i> (leaf)5               | -9.4                  | 1.90 |
| <br>                                         |                       |      |
| Carnivorous plant                            |                       |      |
| <i>Drosera rotundifolia</i> (leaf, control)1 | -11.7                 | 1.03 |
| <i>D. rotundifolia</i> (leaf, control)2      | 0.1                   | 1.34 |
| <i>D. rotundifolia</i> (leaf, control)3      | 2.2                   | 1.87 |
| <i>D. rotundifolia</i> (leaf, control)4      | 0.8                   | 1.45 |
| <i>D. rotundifolia</i> (leaf, control)5      | 3.7                   | 1.44 |



|                                               |        |      |
|-----------------------------------------------|--------|------|
| <i>D. rotundifolia</i> (leaf, 1 week)1        | 163.7  | 1.64 |
| <i>D. rotundifolia</i> (leaf, 1 week)2        | 303.9  | 0.90 |
| <i>D. rotundifolia</i> (leaf, 1 week)3        | 1199.3 | 0.84 |
| <i>D. rotundifolia</i> (leaf, 1 week)4        | 49.8   | 1.43 |
| <i>D. rotundifolia</i> (leaf, 1 week)5        | 367.6  | 1.43 |
| <i>D. rotundifolia</i> (leaf, 2 weeks)1       | 387.7  | 0.78 |
| <i>D. rotundifolia</i> (leaf, 2 weeks)2       | 979.4  | 1.17 |
| <i>D. rotundifolia</i> (leaf, 2 weeks)3       | 436.4  | 0.88 |
| <i>D. rotundifolia</i> (leaf, 2 weeks)4       | 540.5  | 0.81 |
| <i>D. rotundifolia</i> (leaf, 2 weeks)5       | 409.8  | 0.83 |
| Putative carnivorous plant                    |        |      |
| <i>Triantha occidentalis</i> (leaf, control)1 | -3.6   | 1.30 |
| <i>T. occidentalis</i> (leaf, control)2       | -3.0   | 0.90 |
| <i>T. occidentalis</i> (leaf, control)3       | -1.9   | 0.89 |
| <i>T. occidentalis</i> (leaf, control)4       | -1.8   | 1.60 |
| <i>T. occidentalis</i> (leaf, control)5       | -1.1   | 1.30 |
| <i>T. occidentalis</i> (leaf, 1 week)1        | 4.1    | 0.54 |
| <i>T. occidentalis</i> (leaf, 1 week)2        | 1.0    | 1.31 |
| <i>T. occidentalis</i> (leaf, 1 week)3        | -0.8   | 1.10 |
| <i>T. occidentalis</i> (leaf, 1 week)4        | -0.9   | 1.45 |
| <i>T. occidentalis</i> (leaf, 1 week)5        | -0.8   | 1.29 |
| <i>T. occidentalis</i> (leaf, 1 week)6        | -1.9   | 1.62 |
| <i>T. occidentalis</i> (leaf, 1 week)7        | -0.5   | 1.29 |
| <i>T. occidentalis</i> (leaf, 1 week)8        | -0.4   | 1.26 |
| <i>T. occidentalis</i> (leaf, 1 week)9        | -1.6   | 1.34 |
| <i>T. occidentalis</i> (leaf, 1 week)10       | -1.2   | 1.54 |
| <i>T. occidentalis</i> (leaf, 2 weeks)1       | 0.7    | 0.93 |
| <i>T. occidentalis</i> (leaf, 2 weeks)2       | 27.6   | 1.68 |
| <i>T. occidentalis</i> (leaf, 2 weeks)3       | 1.8    | 1.23 |
| <i>T. occidentalis</i> (leaf, 2 weeks)4       | -0.3   | 0.45 |
| <i>T. occidentalis</i> (leaf, 2 weeks)5       | -0.1   | 1.04 |
| <i>T. occidentalis</i> (leaf, 2 weeks)6       | 7.4    | 1.56 |
| <i>T. occidentalis</i> (leaf, 2 weeks)7       | 26.6   | 1.15 |
| <i>T. occidentalis</i> (leaf, 2 weeks)8       | 3.3    | 0.83 |
| <i>T. occidentalis</i> (leaf, 2 weeks)9       | 1.2    | 1.08 |

|                                                 |      |      |
|-------------------------------------------------|------|------|
| <i>T. occidentalis</i> (leaf, 2 weeks)10        | 6.7  | 2.02 |
| <i>T. occidentalis</i> (leaf, double insects)1  | 2.4  | 0.88 |
| <i>T. occidentalis</i> (leaf, double insects)2  | 4.4  | 1.43 |
| <i>T. occidentalis</i> (leaf, double insects)3  | -0.3 | 0.82 |
| <i>T. occidentalis</i> (leaf, double insects)4  | 1.0  | 1.29 |
| <i>T. occidentalis</i> (leaf, double insects)5  | 3.6  | 1.03 |
| <i>T. occidentalis</i> (fruit, control)1        | -4.7 | 0.54 |
| <i>T. occidentalis</i> (fruit, control)2        | -0.5 | 2.15 |
| <i>T. occidentalis</i> (fruit, control)3        | -0.8 | 0.97 |
| <i>T. occidentalis</i> (fruit, control)4        | -1.9 | 1.46 |
| <i>T. occidentalis</i> (fruit, control)5        | -0.4 | 2.38 |
| <i>T. occidentalis</i> (fruit, 1 week)1         | 2.1  | 3.09 |
| <i>T. occidentalis</i> (fruit, 1 week)2         | -0.3 | 2.01 |
| <i>T. occidentalis</i> (fruit, 1 week)3         | 16.6 | 3.26 |
| <i>T. occidentalis</i> (fruit, 1 week)4         | 19.0 | 2.64 |
| <i>T. occidentalis</i> (fruit, 1 week)5         | -0.4 | 2.34 |
| <i>T. occidentalis</i> (fruit, 1 week)6         | 50.8 | 2.74 |
| <i>T. occidentalis</i> (fruit, 1 week)7         | 6.7  | 2.80 |
| <i>T. occidentalis</i> (fruit, 1 week)8         | 1.3  | 1.72 |
| <i>T. occidentalis</i> (fruit, 1 week)9         | 0.6  | 2.66 |
| <i>T. occidentalis</i> (fruit, 1 week)10        | 6.4  | 2.78 |
| <i>T. occidentalis</i> (fruit, 2 weeks)1        | 20.5 | 2.18 |
| <i>T. occidentalis</i> (fruit, 2 weeks)2        | 31.9 | 0.56 |
| <i>T. occidentalis</i> (fruit, 2 weeks)3        | 51.2 | 0.80 |
| <i>T. occidentalis</i> (fruit, 2 weeks)4        | 39.5 | 1.52 |
| <i>T. occidentalis</i> (fruit, 2 weeks)5        | 11.4 | 1.90 |
| <i>T. occidentalis</i> (fruit, 2 weeks)6        | 7.6  | 1.48 |
| <i>T. occidentalis</i> (fruit, 2 weeks)7        | 7.6  | 0.00 |
| <i>T. occidentalis</i> (fruit, 2 weeks)8        | 5.7  | 2.04 |
| <i>T. occidentalis</i> (fruit, 2 weeks)9        | 2.0  | 1.50 |
| <i>T. occidentalis</i> (fruit, 2 weeks)10       | 15.0 | 1.26 |
| <i>T. occidentalis</i> (fruit, double insects)1 | 29.0 | 0.55 |
| <i>T. occidentalis</i> (fruit, double insects)2 | 29.5 | 0.70 |
| <i>T. occidentalis</i> (fruit, double insects)3 | 40.0 | 0.60 |
| <i>T. occidentalis</i> (fruit, double insects)4 | 5.3  | 1.72 |

|                                                 |                    |      |
|-------------------------------------------------|--------------------|------|
| <i>T. occidentalis</i> (fruit, double insects)5 | 28.1               | 1.12 |
| <i>T. occidentalis</i> (stem, control)1         | failed in analysis | 0.28 |
| <i>T. occidentalis</i> (stem, control)2         | -4.1               | 0.35 |
| <i>T. occidentalis</i> (stem, control)3         | -3.8               | 0.33 |
| <i>T. occidentalis</i> (stem, control)4         | -6.5               | 0.38 |
| <i>T. occidentalis</i> (stem, control)5         | failed in analysis | 0.24 |
| <i>T. occidentalis</i> (stem, 1 week)1          | 2.5                | 0.56 |
| <i>T. occidentalis</i> (stem, 1 week)2          | 15.0               | 0.36 |
| <i>T. occidentalis</i> (stem, 1 week)3          | 13.7               | 0.36 |
| <i>T. occidentalis</i> (stem, 1 week)4          | 19.0               | 0.73 |
| <i>T. occidentalis</i> (stem, 1 week)5          | 0.1                | 1.30 |
| <i>T. occidentalis</i> (stem, 1 week)6          | 63.9               | 0.71 |
| <i>T. occidentalis</i> (stem, 1 week)7          | 9.9                | 0.46 |
| <i>T. occidentalis</i> (stem, 1 week)8          | 6.5                | 0.53 |
| <i>T. occidentalis</i> (stem, 1 week)9          | 3.2                | 0.76 |
| <i>T. occidentalis</i> (stem, 1 week)10         | 11.2               | 0.50 |
| <i>T. occidentalis</i> (stem, 2 weeks)1         | failed in analysis | 0.21 |
| <i>T. occidentalis</i> (stem, 2 weeks)2         | 360.5              | 0.28 |
| <i>T. occidentalis</i> (stem, 2 weeks)3         | 189.6              | 0.35 |
| <i>T. occidentalis</i> (stem, 2 weeks)4         | 310                | 0.31 |
| <i>T. occidentalis</i> (stem, 2 weeks)5         | 245                | 0.25 |
| <i>T. occidentalis</i> (stem, 2 weeks)6         | 1036.6             | 0.31 |
| <i>T. occidentalis</i> (stem, 2 weeks)7         | 1448.3             | 0.40 |
| <i>T. occidentalis</i> (stem, 2 weeks)8         | failed in analysis | 0.27 |
| <i>T. occidentalis</i> (stem, 2 weeks)9         | 316                | 0.33 |
| <i>T. occidentalis</i> (stem, 2 weeks)10        | 372.6              | 0.31 |
| <i>T. occidentalis</i> (stem, double insects)1  | 324.8              | 0.23 |
| <i>T. occidentalis</i> (stem, double insects)2  | 744.3              | 0.25 |
| <i>T. occidentalis</i> (stem, double insects)3  | 357.0              | 0.23 |
| <i>T. occidentalis</i> (stem, double insects)4  | 116                | 0.21 |
| <i>T. occidentalis</i> (stem, double insects)5  | failed in analysis | 0.23 |
| Insects collected at study site1                | 0.24               | 2.17 |
| Insects collected at study site2                | 2.53               | 3.25 |
| Insects collected at study site3                | 2.63               | 3.53 |
| Insects collected at study site4                | 1.45               | 8.57 |

|                                             |         |       |
|---------------------------------------------|---------|-------|
| <i>Drosophila melanogaster</i> (unlabeled)1 | 3.96    | 9.52  |
| <i>Drosophila melanogaster</i> (unlabeled)2 | 3.99    | 9.41  |
| <i>Drosophila melanogaster</i> (unlabeled)3 | 4.20    | 9.57  |
| <i>Drosophila melanogaster</i> (unlabeled)4 | 3.79    | 9.37  |
| <i>Drosophila melanogaster</i> (labeled)1   | 7183.4  | 7.75  |
| <i>Drosophila melanogaster</i> (labeled)2   | 8030.7  | 9.91  |
| <i>Drosophila melanogaster</i> (labeled)3   | 8216.2  | 8.49  |
| <i>Drosophila melanogaster</i> (labeled)4   | 6827.51 | 8.84  |
| <i>Drosophila melanogaster</i> (labeled)5   | 7476.00 | 10.33 |
| <i>Drosophila melanogaster</i> (labeled)6   | 7095.84 | 9.56  |
